# Supplementary material
Source: publisher figshare collection journal article supplement (https://tandf.figshare.com/ndownloader/files/14085491)
Supplement: Supplementary file 1 [file 14085491]

**Supplemental Information**

**Extended log-normal method of moments for solving the population balance equation for Brownian coagulation**

Kaiyuan Wanga, Suyuan Yua, Wei Pengb,c*

a *Center for Combustion Energy,* *Key Laboratory for Thermal Science and Power Engineering of Ministry of Education, Department of Energy and Power Engineering, Tsinghua University, Beijing 100084, China*

b *Institute of Nuclear and New Energy Technology,* *Advanced Nuclear Energy Technology Cooperation Innovation Center, Key Laboratory of Advanced Nuclear Engineering and Safety of Ministry of Education, Tsinghua University, Beijing 100084, China*

c *State Environmental Protection Key Laboratory of Sources and Control of Air Pollution Complex, Beijing 100084, China*

This section describes the reconstruction of the four size distribution parameters from the first four moments.

For =0, 1, 2 and 3, Eq. (14) becomes

, (S1)

, (S2)

, (S3)

. (S4)

Thus, is equal to the zeroth moment.

Combining the formula with Eqs. (S1) to (S4) gives

. (S5)

This indicates that is the root of . The derivative of is , so has two stationary points, and . For , . For ,

. (S6)

Substituting Eqs. (S1) to (S4) into Eq. (S6) shows that the sign of is the same as that of . This formula can be easily shown to be no greater than 0, so . Due to the conditions , , and , has three real roots. Then should be equal to the second real root (sorted in descending order), as will be discussed later. Thus, is expressed as

. (S7)

Substituting Eqs. (S1) and (S7) into Eqs. (S2) and (S3) shows that and satisfy the following quadratic equation:

. (S8)

Then and can be obtained by solving Eq. (S8):

, (S9)

. (S10)

From Eqs. (S9) and (S10), should be no greater than because of the square root, which indicates that must be the second real root of . Thus, the reconstruction problem has one and only one solution, as shown in Eqs. (S1), (S7), (S9) and (S10).
